# Supplementary material
Source: PubMed Central journal article supplement (PMC2262974)
Supplement: mbc_E06-12-1140_1.pdf [file mbc_E06-12-1140_1.pdf]

## E06-12-1140 Jabrane-Ferrat

**Figure S1.** (A) Immunofluorescence of COS-7 and DLD-1 cells, control or treated for 16h with proteasome inhibitor PS-341. Cells were stained for gamma-tubulin (red), and DNA (blue). Images were deconvolved using DeltaVision software. Bar, 15  $\mu$ m. (B) Western blot analysis of centrosome-enriched fractions prepared from control and PS-341 treated Raji cells on a sucrose step gradient, probed with antibody against gamma-tubulin.

**Figure S2.** Gamma-tubulin accumulation at the centrosome increases specifically after proteasome inhibition. (A) Cell cycle analysis by flow cytometry of propidium iodide-stained HeLa cells, treated with proteasome inhibitor PS-341, or control cells (Ctrl). Top: asynchronous cells, bottom: cells that were synchronized in the S phase by a 5mM thymidine block for 24h, followed by 4 h release in fresh media, followed by 16h control treatment (Ctrl), or treatment with PS-341. The table summarizes the cell cycle analysis using DIVA software. (B) Immunofluorescence of HeLa cells, treated for 16h with proteasome inhibitor PS-341, or with a set of chemotherapeutic drugs, including Bleomycin (Bleo), Adriamycin (Adr), Etoposide (VP16), Camptothecin (CAM), 5-Fluorouracil (5-FU), Cisplatin (Cis), and Vinorelbine (VNB). Cells were stained for gamma-tubulin (green) and DNA (blue). Bar, 10  $\mu$ m.

**Figure S3.** Proteasome components co-sediment with centrosome proteins. (A) Western blot analysis of centrosome-enriched fractions (1 through 16) prepared from HeLa cells on a step gradient of 70, 50, and 40% sucrose, probed with antibodies against gamma-tubulin, centrin and against the beta7-subunit of the proteasome. (B) Centrosomes were purified as in A except that larger volumes were collected per fraction, resulting in seven fractions only. Proteasome peptidase activities were determined from 20  $\mu$ l of fractions 1 to 7. 100  $\mu$ M of Z-

LLE-AMC or Suc-LLVY-AMC were used as substrate for caspase- or chymotrypsine-like (CTL) activities. 50 mM of lactacystin (+Lact) was included as a specific proteasome inhibitor. (C) 20  $\mu$ l of each centrosome fraction from B were resolved on a 4.5% native gel overlaid with 2% stacking gel. The gel was subsequently developed in the presence of ATP and Suc-LLVY-AMC substrate peptide. The 26S (5  $\mu$ g) and 20S (5  $\mu$ g) proteasomal complexes were included for reference (lanes a and b), to depict the relative migration of proteasomal sub-complexes.

**Figure S4.** Immunofluorescence of HeLa cells, control or treated for 16h with proteasome inhibitor PS-341. (A) Cells were stained for gamma-tubulin (red) and NEDD1 (green), (B) gamma-tubulin (red) and GCP4 (green) or (C) gamma tubulin and PCM1 (green). Enlarged views of the centrosomes are shown on the left side. Scale bar, 10  $\mu$ m.

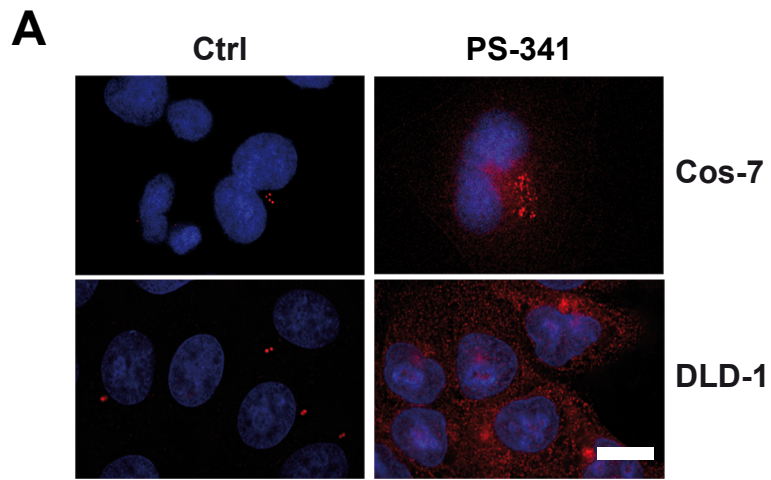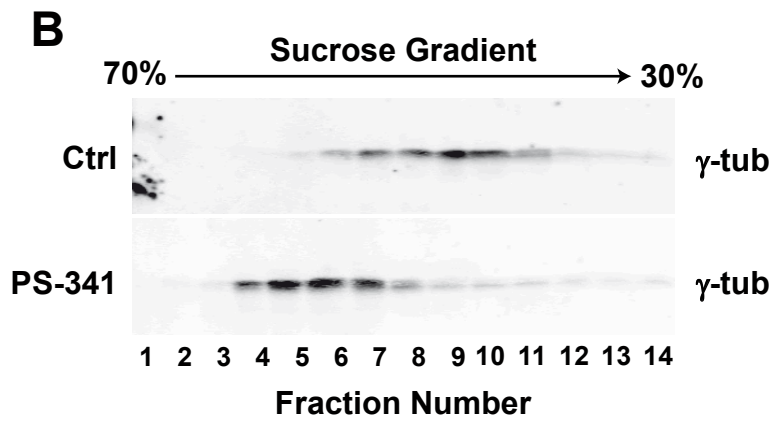

**Fig. S1**

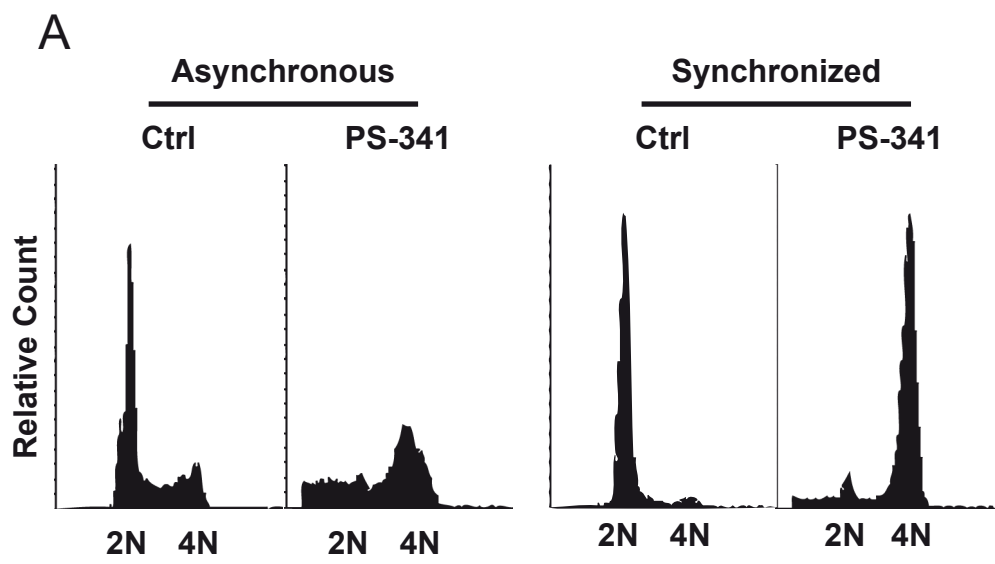

|             | Asynchronous |        | Synchronized |        |
|-------------|--------------|--------|--------------|--------|
| %           | Ctrl         | PS-341 | Ctrl         | PS-341 |
| <b>G1</b>   | 58.3         | 12.5   | 88.9         | 9.3    |
| <b>G2/M</b> | 22           | 55.5   | 4.4          | 72.1   |
| <b>S</b>    | 19.7         | 9.4    | 3.6          | 11.3   |

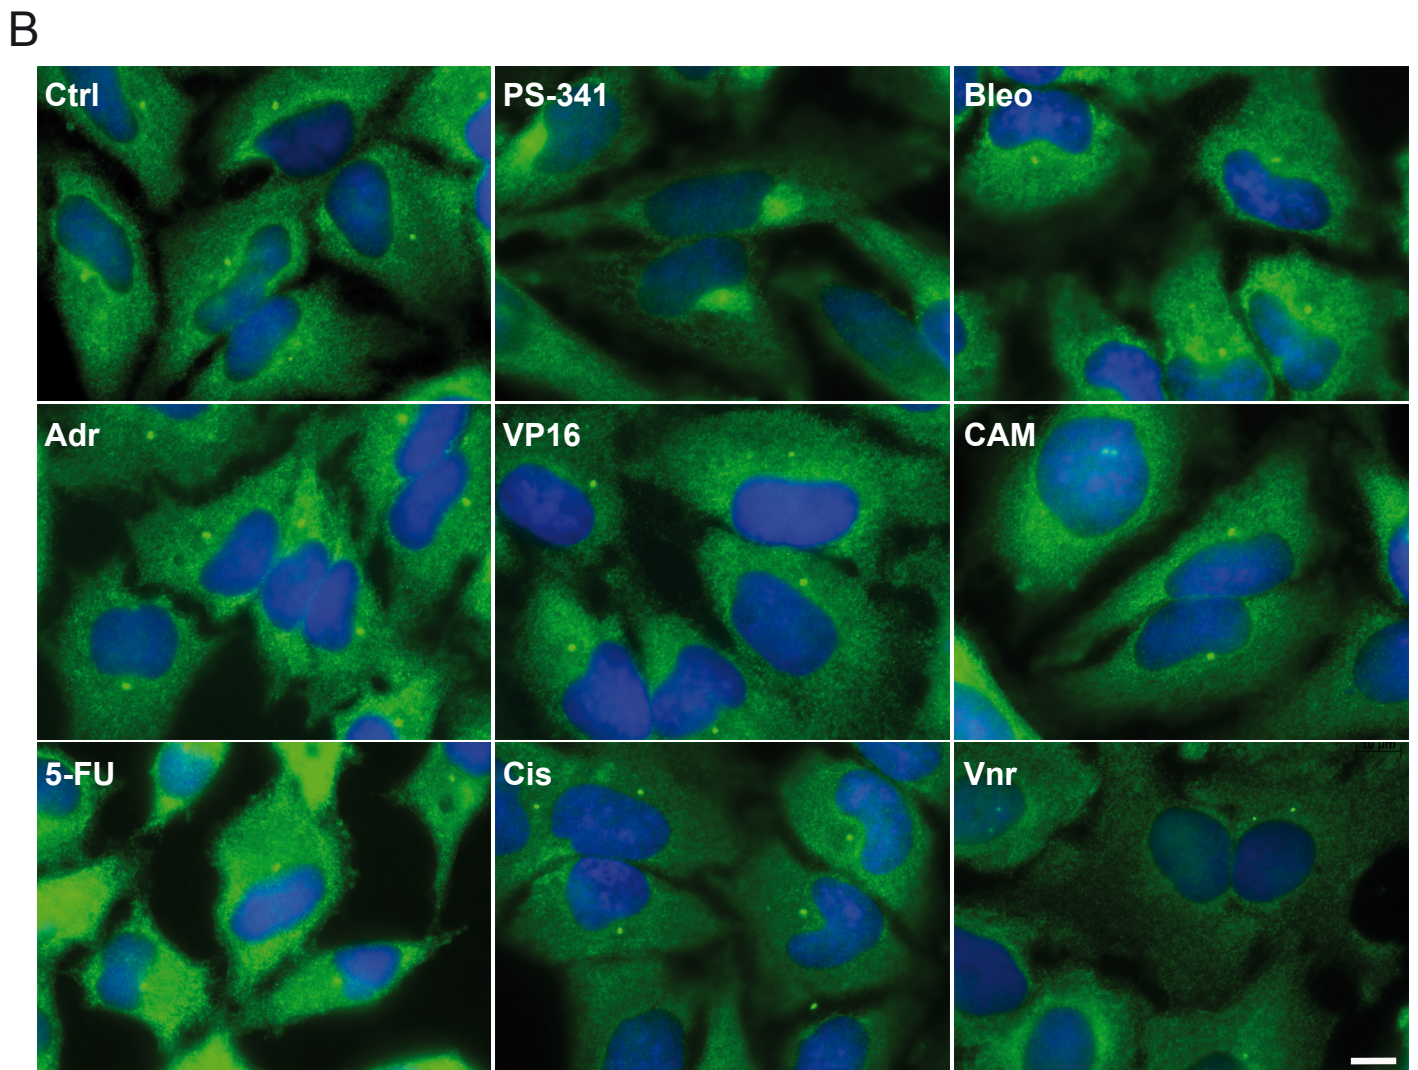

**Fig. S2**



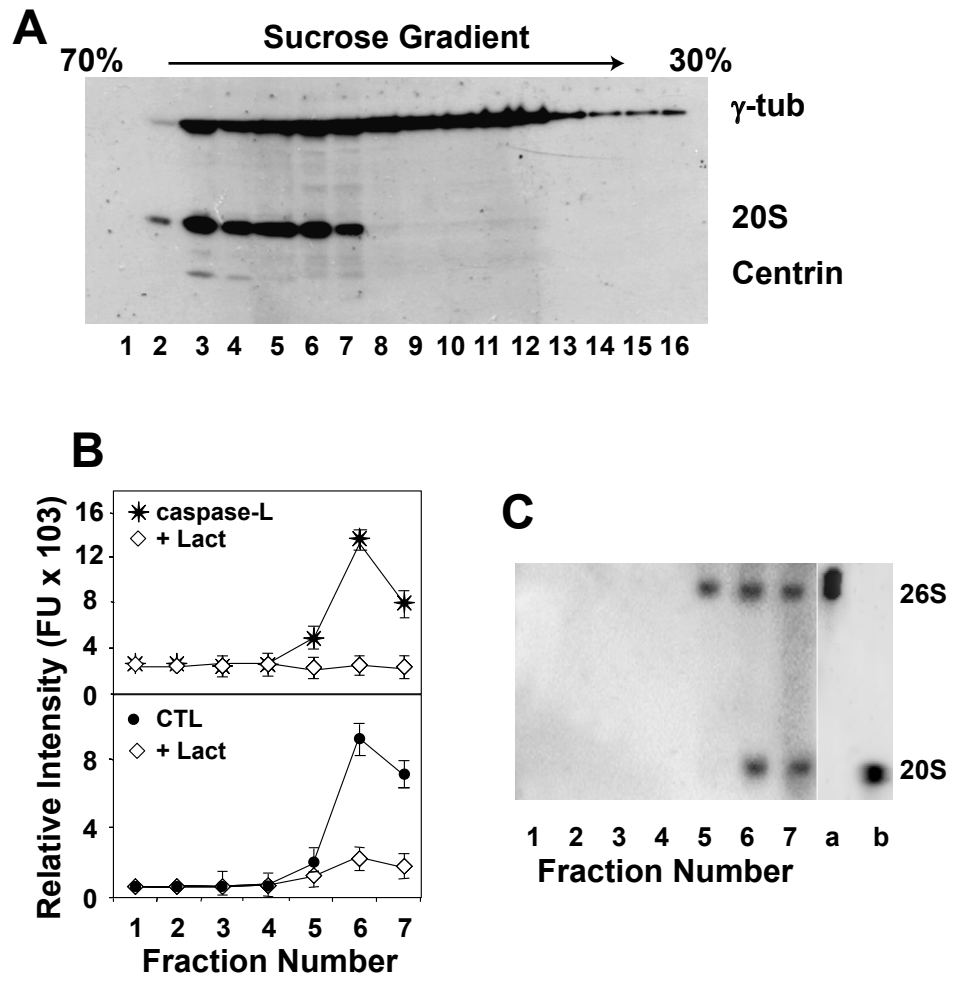

**Fig. S3**

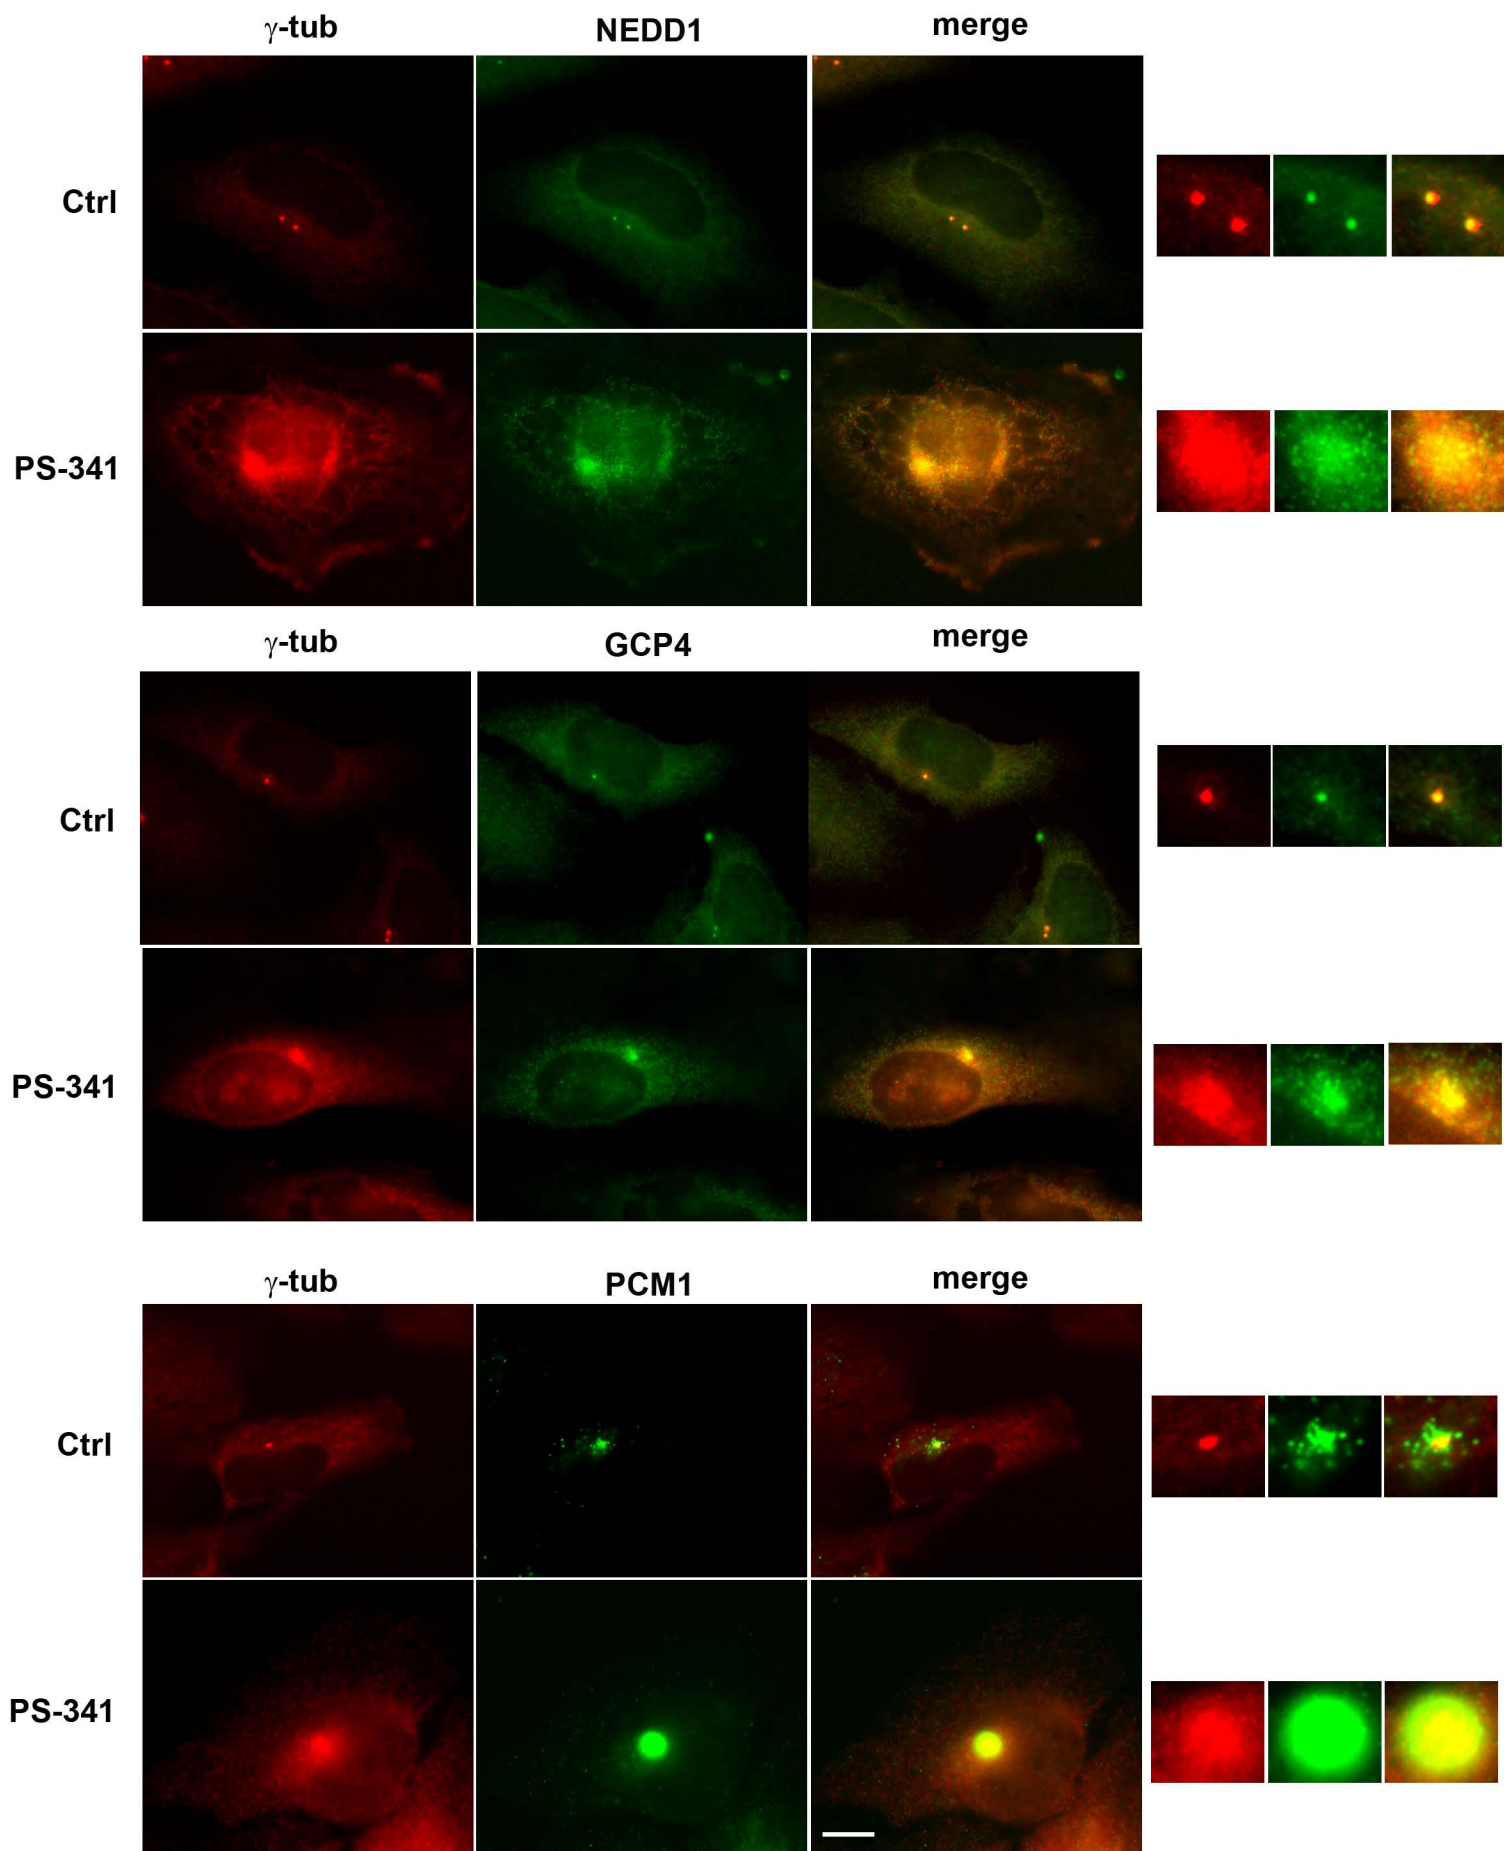

**Fig. S4**
